# Supplementary material
Source: PubMed Central journal article supplement (PMC3092947)
Supplement: 97320630006144S1.pdf [file 97320630006144S1.pdf]

## Supplementary material:

**Table 1:** Ramchandran plot and Z-score of the models

| Model                | Ramachandran plot | Prosa2003 |
|----------------------|-------------------|-----------|
| AGPase Large subunit | 88.4              | -9.54     |
| AGPase Small subunit | 89.3              | -8.17     |
| Template (1YP2)      | 87.5              | -8.76     |

**Table 2:** Hydrogen bonding pattern in complex

| Donor      | Acceptor   | Distance(Å) |
|------------|------------|-------------|
| THR A* 422 | MET B* 138 | 2.11        |
| ARG A* 420 | GLY B* 47  | 1.98        |
| SER B* 306 | SER A* 259 | 3.17        |
| ILE B* 311 | GLU A* 241 | 3.14        |
| GLN A* 113 | GLU B* 286 | 1.96        |
| LYS B* 291 | GLN A* 70  | 3.31        |

\*A- Small subunit; \*B- Large subunit

**Table 3:** Hydrophobic contacts in the complex

| Total contacts | *SS amino acids | *LS amino acids | Distance(Å) |
|----------------|-----------------|-----------------|-------------|
| 10             | Tyr30           | Lys 291         | 2.72-3.80   |
| 2              | Trp111          | Asp289          | 3.71-3.87   |
| 5              | Gln113          | Glu286          | 2.34-3.77   |
| 4              | Glu192          | Pro302, Pro303  | 3.40-3.82   |
| 6              | Lys193          | Tyr300          | 3.35-3.76   |
| 4              | Phe243          | Ser306, Cys309  | 3.13-3.63   |
| 11             | Pro244          | Ile311, Lys312  | 2.83-3.72   |
| 3              | Gly245          | Ala314, Ile315  | 2.84-3.83   |
| 3              | Ser251          | Pro303          | 3.40-3.77   |
| 4              | Ser259          | Lys305          | 2.59-3.59   |
| 2              | Ala413          | Thr78           | 3.35-3.89   |
| 6              | Val415          | Thr78           | 2.09-3.85   |
| 5              | Ala419          | Asn45, Gly47    | 3.38-3.57   |
| 2              | Glu421          | Met138          | 3.25-3.65   |
| 8              | Thr422          | Met138          | 2.89-3.87   |

\*SS- Small subunit; \*LS- Large subunit

**Table 4:** Accessible surface area values for AGP-S amino acids in unbound and bound stage

| SS* Amino acids | Uncomplex | Complex |
|-----------------|-----------|---------|
| Tyr30           | 75.88     | 28.04   |
| Trp111          | 89.44     | 33.41   |
| Gln113          | 109.75    | 17.85   |
| Glu192          | 89.97     | 33.02   |
| Lys193          | 102.56    | 51.7    |
| Phe243          | 50.89     | 6.16    |
| Pro244          | 70.32     | 17.79   |
| Gly245          | 63.04     | 15.07   |
| Ser251          | 40.8      | 14.78   |
| Ser259          | 96.06     | 13.41   |
| Ala413          | 102.1     | 65.39   |
| Val415          | 65.94     | 28.25   |
| Ala419          | 62.7      | 33.05   |
| Glu421          | 41.9      | 12.1    |
| Thr422          | 103.87    | 69.52   |

\*SS- Small subunit

**Table 5:** Accessible surface area values for AGP-L amino acids in unbound and bound stage

| LS* Amino acids | Uncomplex | Complex |
|-----------------|-----------|---------|
| Asn45           | 59.41     | 21.49   |
| Gly42           | 5.2       | 4.63    |
| Gln70           | 19.17     | 17.05   |
| Thr78           | 109.51    | 30.17   |
| Met138          | 95.99     | 20.27   |
| Glu286          | 69.69     | 10.06   |
| Asp289          | 26.29     | 4.64    |
| Lys291          | 167.82    | 36.53   |
| Thr300          | 203.15    | 104.67  |
| Pro302          | 70.93     | 41.6    |
| Pro303          | 120.86    | 20.94   |
| Lys305          | 118       | 85.79   |
| Ser306          | 50.81     | 12.61   |
| Cys309          | 33.28     | 6.89    |
| Ile311          | 61.78     | 3.34    |
| Lys312          | 141.95    | 134.54  |
| Ala314          | 26.08     | 2.6     |

\*LS- Large subunit
